# Supplementary material for: EBF1 drives hallmark B cell gene expression by enabling the interaction of PAX5 with the MLL H3K4 methyltransferase complex
Source: PubMed Central journal article supplement (PMC7810865; doi:10.1038/s41598-021-81000-5), 2021-01-15
Supplement: 41598_2021_81000_MOESM2_ESM.pdf [file 41598_2021_81000_MOESM2_ESM.pdf]

1 **Title:** EBF1 drives hallmark B cell gene expression by enabling the interaction of PAX5  
2 with the MLL H3K4 methyltransferase complex

3

4 **Authors:** Charles E. Bullerwell, Philippe Pierre Robichaud, Pierre M.L. Deprez, Andrew  
5 P. Joy, Gabriel Wajnberg, Darwin D'Souza, Simi Chacko, Sébastien Fournier, Nicolas  
6 Crapoulet, David A. Barnett, Stephen M. Lewis, Rodney J. Ouellette

7

8

9 **Supplementary Table Legends**

10 **Supplementary Table S1. Differential gene expression in KIS-1 versus RAJI as**  
11 **determined by RNA-seq**

12 Sheet 1: all data, with genes showing a differential expression of  $<2.5$  or  $>-2.5$  log<sub>2</sub> fold  
13 change indicated in red

14 Sheet 2: all data with pdj (FDR)  $\leq 0.05$ , with genes showing a differential expression of  
15  $<2.5$  or  $>-2.5$  log<sub>2</sub> fold change indicated in red

16

17 **Supplementary Table S2. SNPs and Indels in KIS-1 based on RNA-seq data**

18 Sheet 1: SNPs

19 Sheet 2: Indels

20

21 **Supplementary Table S3. Significantly differentially-expressed genes in the**  
22 **presence or absence of EBF1 expression**

23 **a** KIS+empty +/-DOX

24 **b** KIS1+EBF1 -DOX vs KIS1+empty -DOX

25 **c** KIS1+EBF1 +/-DOX

26 Sheet 1: all data, with genes showing a differential expression of  $<2.5$  or  $>-2.5$  log<sub>2</sub> fold  
27 change indicated in red

28 Sheet 2: all genes showing a differential expression of  $<2.5$  or  $>-2.5$  log<sub>2</sub> fold change  
29 with pdj (FDR)  $\leq 0.05$

30 **d** KIS1+EBF1 +DOX vs KIS1+empty +DOX

31 Sheet 1: all data, with genes showing a differential expression of  $<2.5$  or  $>-2.5$  log<sub>2</sub> fold  
32 change indicated in red

33 Sheet 2: all genes showing a differential expression of  $<2.5$  or  $>-2.5$  log<sub>2</sub> fold change  
34 with pdj (FDR)  $\leq 0.05$

35 e Upregulated genes from KIS1+EBF1 +/-DOX and/or KIS1+EBF1 +DOX vs  
36 KIS1+empty +DOX

37

38 **Supplementary Table S4. Proteins associated with PAX5 in KIS-1+EBF1+/-DOX as**  
39 **determined by Mass Spectrometry**

40 **Sheet 1:** Unique peptide counts

41 **Sheet 2:** Combined proteins found to interact with PAX5 in both DOX+ and DOX- (at  
42 least 2 peptides identified in each replicate)

43 **Sheet 3:** Proteins with increased PAX5 binding in the presence of DOX ( $\geq 1.5$ -fold  
44 unique peptides in DOX+ versus DOX- and at least 2 unique peptides in each DOX+  
45 replicate.

46 **Sheet 4:** Proteins with decreased PAX5 binding in the presence of DOX ( $\geq 1.5$ -fold  
47 unique peptides in DOX- versus DOX+ and at least 2 unique peptides in each DOX-  
48 replicate.

49 **Sheet 5:** PAX5-associated proteins assigned to Gene Ontology groups using the  
50 Panther overrepresentation test

51 **Sheet 6:** Proteins with increased PAX5 binding in the presence of DOX assigned to  
52 Gene Ontology groups using the Panther overrepresentation test

53

54 **Supplementary Table S5. KMT2 complex components (see Rao and Dou, 2015)**  
 55 **identified in proteomics data following immunoprecipitation of PAX5 (C20) or**  
 56 **using non-specific, control antibodies (IgG).**

57 Number of unique peptides identified by mass spectrometry is indicated.

|                                            |                | KIS-1+EBF1 |       |      |       | NALM6 |     |      |     | RAJI |     |      |     |
|--------------------------------------------|----------------|------------|-------|------|-------|-------|-----|------|-----|------|-----|------|-----|
|                                            |                | +DOX       | - DOX | +DOX | - DOX | Rep1  |     | Rep2 |     | Rep1 |     | Rep2 |     |
|                                            |                | Rep1       | Rep1  | Rep2 | Rep2  | C20   | C20 | IgG  | IgG | C20  | C20 | IgG  | IgG |
|                                            | <b>PAX5</b>    | 17         | 20    | 19   | 17    | 18    | 15  | 0    | 0   | 18   | 15  | 0    | 0   |
| <b>Subunits common to KMT2 complexes</b>   | ASH2L          | 5          | 0     | 1    | 1     | 0     | 0   | 0    | 0   | 2    | 2   | 0    | 0   |
|                                            | RBBP5          | 3          | 1     | 2    | 1     | 4     | 0   | 0    | 0   | 2    | 2   | 0    | 0   |
|                                            | WDR5           | 5          | 3     | 2    | 1     | 3     | 6   | 0    | 0   | 4    | 0   | 0    | 0   |
|                                            | DPY30          | 1          | 0     | 0    | 0     | 0     | 0   | 0    | 0   | 0    | 0   | 0    | 0   |
| <b>Subunits unique to KMT2A/2B complex</b> | KMT2A          | 9          | 3     | 5    | 3     | 8     | 2   | 0    | 0   | 0    | 12  | 2    | 0   |
|                                            | KMT2B          | 0          | 0     | 0    | 0     | 0     | 0   | 0    | 0   | 0    | 0   | 3    | 0   |
|                                            | MEN1           | 10         | 6     | 7    | 7     | 0     | 0   | 0    | 0   | 3    | 3   | 0    | 0   |
|                                            | HCFC1 or HCFC2 | 5          | 1     | 0    | 0     | 12    | 6   | 0    | 0   | 4    | 9   | 0    | 0   |
| <b>Subunits unique to KMT2C/2D complex</b> | KMT2C          | 0          | 0     | 0    | 0     | 0     | 0   | 0    | 0   | 0    | 0   | 2    | 0   |
|                                            | KMT2D          | 0          | 1     | 0    | 0     | 0     | 0   | 0    | 0   | 0    | 0   | 3    | 0   |
|                                            | PAXIP1         | 0          | 0     | 0    | 0     | 2     | 0   | 0    | 0   | 0    | 0   | 0    | 0   |
|                                            | PAGR1          | 0          | 0     | 0    | 0     | 0     | 0   | 0    | 0   | 0    | 0   | 0    | 0   |
|                                            | NCOA6          | 0          | 1     | 0    | 0     | 0     | 0   | 0    | 0   | 0    | 0   | 2    | 0   |
|                                            | KDM6A          | 0          | 0     | 0    | 0     | 0     | 0   | 0    | 0   | 0    | 0   | 0    | 0   |
| <b>Subunits unique to KMT2F/2G complex</b> | KMT2F          | 0          | 0     | 0    | 0     | 0     | 0   | 0    | 0   | 0    | 0   | 0    | 0   |
|                                            | KMT2G          | 0          | 0     | 0    | 0     | 0     | 0   | 0    | 0   | 0    | 0   | 0    | 0   |
|                                            | CXXC1          | 0          | 0     | 0    | 0     | 6     | 2   | 0    | 0   | 0    | 0   | 0    | 0   |
|                                            | WDR82          | 0          | 0     | 0    | 0     | 3     | 0   | 0    | 0   | 0    | 0   | 0    | 0   |
|                                            | HCFC1          | 5          | 1     | 0    | 0     | 12    | 6   | 0    | 0   | 4    | 9   | 0    | 0   |

58

59

60

61

62

63

64

65 **Supplementary Figures**

66 **Supplementary Figure S1. Western blot of MEN1 and KMT2A following 48h DOX**

67 **induction of KIS-1+EBF1 and KIS-1+empty cells shown by Western blotting.**

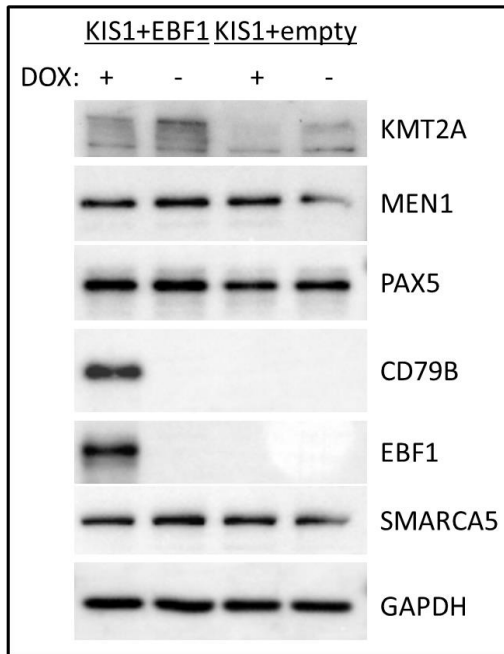

68

69

70 **Supplementary Figure S2. Activation of CD19 (A) and CD79b (B) expression**

71 **following exogenous expression of a control gene (CAT) or EBF1 in HEK293T**

72 **cells shown by RT-PCR**

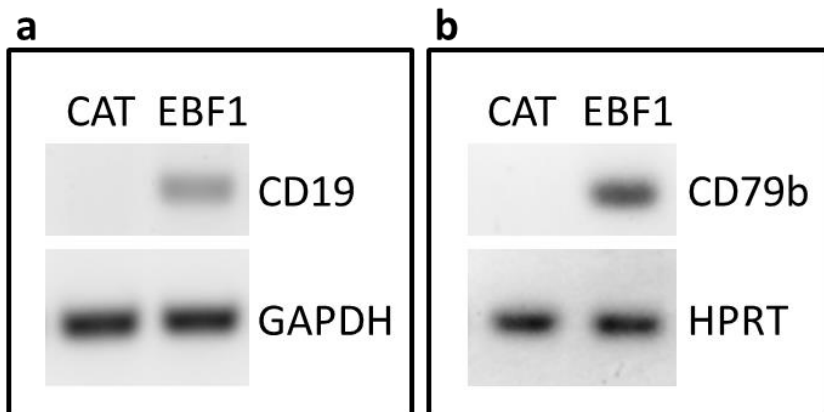

73

74

75 **Supplementary Figure S3. Western blot of CD19 and CD79b following silencing of**  
76 **PAX5 (a) and EBF1 (b) in REH cells**

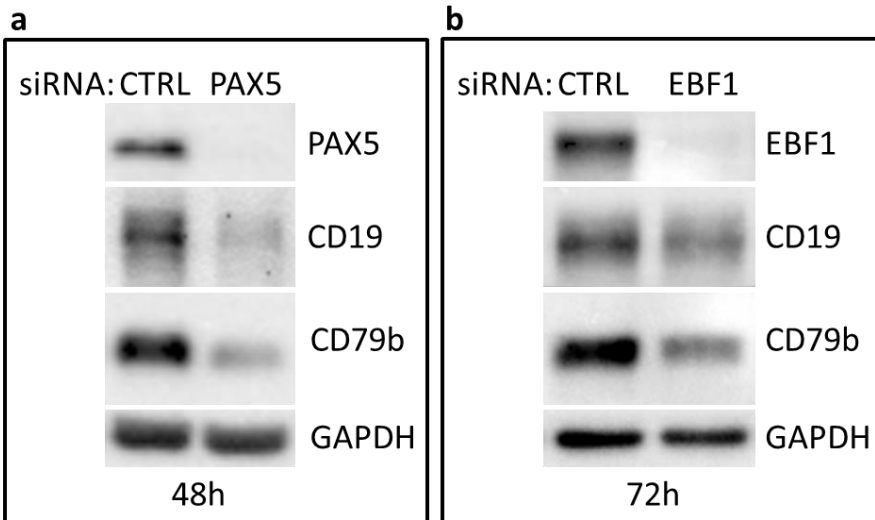

77  
78  
79  
80  
81  
82  
83  
84  
85  
86  
87  
88  
89  
90  
91  
92  
93  
94

**Supplementary Figure S4. Native chromatin immunoprecipitation coupled with quantitative PCR (N-ChIP-qPCR).** Native chromatin has been immunoprecipitated from EBF1 inducible KIS-1 cells, incubated with or without 100 ng/ml DOX for 48h, using negative control IgG (**A**), H3K4me2 (**B** and **D**) and H3K4me3 (**C** and **E**) antibodies. Several promoter and UTR/CDS regions of CD19 and CD79B genes as well as one negative control (AM NEG) and two positive controls (cFOS and HPRT) were quantified by qPCR. Data are expressed as percentage of input (**A**, **B** and **C**) and as fold enrichment (**D** and **E**). Data are the means  $\pm$  SEM of 3 independent experiments (n=3).

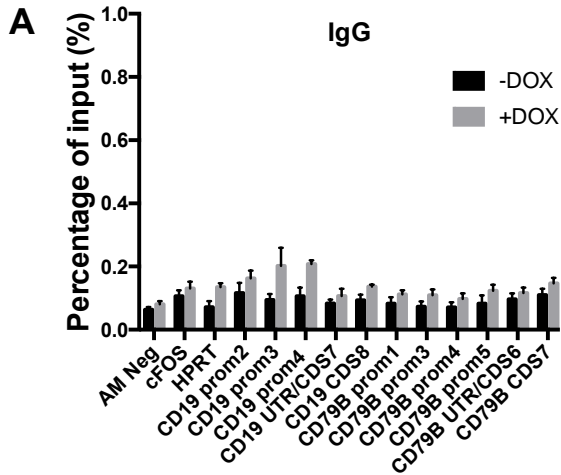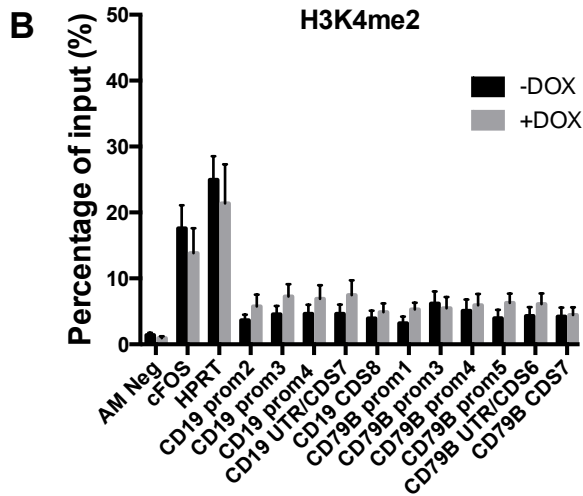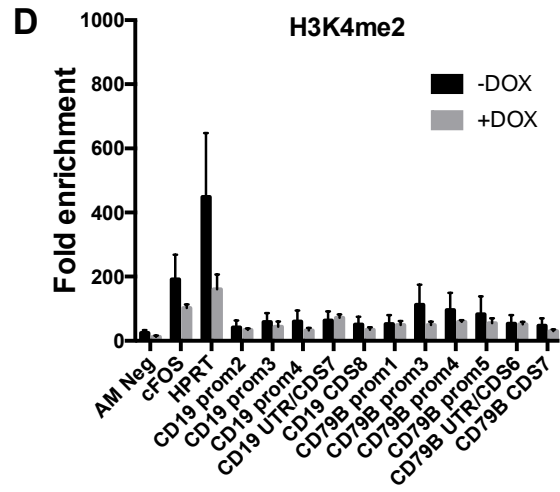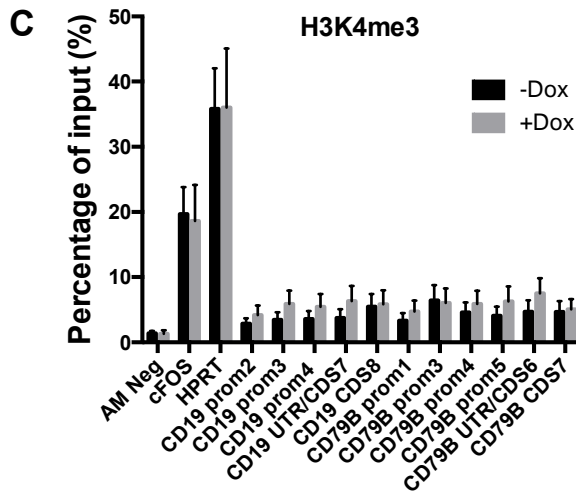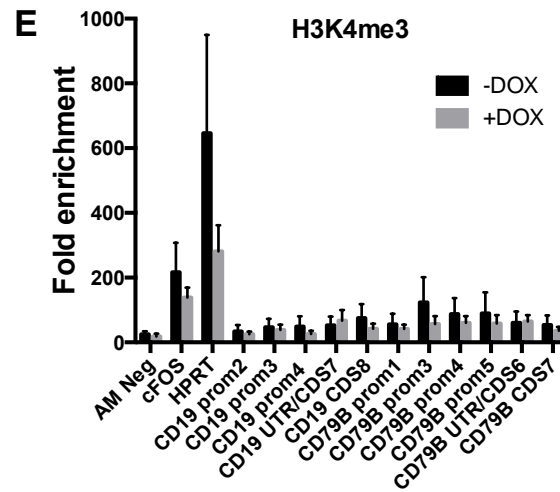

95

96 **Supplementary Methods**

97 **Growth and transfection of HEK293T cells (Supplementary Figure S2).**

98 HEK293T cells were obtained from the American Type Culture Collection (ATCC  
99 CRL-3216) and cultured in DMEM high glucose media supplemented with 10% FBS,  
100 2mM L-glutamine and 1x Glutamax (GIBCO). Cells were trypsinized and split 1/10 with  
101 media every three days.

102 The EBF1 coding sequence was PCR amplified using Taq polymerase *Pfx* from  
103 plasmid MHS6278-202758239 (Dharmacon) using the primers 5'-  
104 CCCTCGTAAAGAATTATGTTTGGGATTCAGGAAAGCATCCAACG-3' and 5'-  
105 GTGTATACGGGAATTTACATAGGAGGAACAATCATGCCAGATATCG-3' and  
106 CloneAmp HiFi PCR Premix (Clontech). Primers for PCR amplification were designed to  
107 add the flanking attB sequences necessary for subsequent Gateway® cloning.  
108 Amplicons were cloned into pDONR 221 (Invitrogen) and then transferred into the  
109 expression vector pcDNA3.2 V5 DESTplasmid (Invitrogen) without the STOP codon in  
110 order to fuse the ORF to a V5 peptide tag. pcDNA3.2/V5/GW-CAT (Invitrogen) was  
111 used as a negative control. All cloned DNA fragments were verified by sequencing.

112 HEK293T cells were transfected at approximately 75% confluence. Cells grown  
113 in 6-well plates were washed with PBS and then transfected with 4µg plasmid and 10µL  
114 Lipofectamine 2000 (Invitrogen) in a final volume of 2.5mL of media. Cells were  
115 maintained in an actively growing state by splitting transfections by half at 24h post-  
116 transfection. Cells were harvested at 48h post-transfection.

117

118



119 **Native chromatin immunoprecipitation coupled with quantitative PCR (N-ChIP-**  
120 **qPCR) (Supplementary Figure S4).**

121 Native chromatin immunoprecipitation were performed using the Chromatrap®  
122 Native ChIP pro G kit (#500238) following the manufacturer protocol. Briefly, native  
123 chromatin were prepared from 15x10<sup>6</sup> of stably transduced KIS-1 cells with lentiviral  
124 EBF1 inducible vector treated with 100ng/ml doxycycline (DOX+) or vehicle (water;  
125 DOX-) for 48h. Nanodrop quantified chromatin were enzymatically sheared using 1U of  
126 shearing cocktail per 5 ug of chromatin as recommended by the manufacturer protocol.  
127 The chromatin shearing efficiencies were verified using the Advanced Analytical 5200  
128 fragment analyzer (Agilent) and a ratio of 2 ug of antibody per 5 ug of chromatin has  
129 been used to perform the immunoprecipitation as recommended. The control antibody  
130 IgG (#2729S) was from cell signaling and the anti-H3K4me2 (#ab7766) and the anti-  
131 H3K4me3 (#ab8580) antibodies were from abcam. Immunoprecipitated DNA were  
132 extracted and several regions of CD19 and CD79B genes promoters/UTR/CDS as well  
133 as one negative control (AM NEG) and two positive controls (cFOS and HPRT) were  
134 quantified by qPCR using the 2x BR SYBR® Green SuperMix (Quanta Biosciences) on  
135 a CFX connect qPCR instrument (Bio-Rad). Data have been express as percentage of  
136 input and fold enrichment.

137 Primers used for qPCR:

138 **AM NEG**, Active Motif ChIP Human Negative Control Primers Set 1 (#71001)

139 **cFOS** 5'- TTAGGACATCTGCGTCAGCAGGTT-3', 5'-

140 TCTCGTGAGCATTTCGCAGTTCCT-3'

141 **HPRT** 5'- GTTGGGAGGGAAAGGGGCTTC-3', 5'- ACGCCGGCGCCTACCAGTT-3'

142 **CD19 prom2** 5'-GAGAAGGAGTCTATGTGCCAGCA-3', 5'-  
143 CTGCACAAGAATGTGAGCCCCTTG-3'

144 **CD19 prom3** 5'- CAAGGGGCTCACATTCTTGTGCAG-3', 5'-  
145 CTGCCACGCTGTTTTATTTTCATCCCA-3'

146 **CD19 prom4** 5'- TGGGATGAAAATAAAACAGCGTGGCAG-3', 5'-  
147 GAGGAAGGCGGTGGTCACG-3'

148 **CD19 UTR/CDS7** 5'- CCTCTTCTTCCTCCTCCTCCTCACC-3', 5'-  
149 CCCTTCCCTTTCTGCCCTTTGG-3'

150 **CD19 CDS8** 5'- CCAAAGGGCAGAAAGGGAAGGG-3', 5'-  
151 TAAGAAAATGGAGGCTCAGAGAGGGTAAGT-3'

152 **CD79B prom1** 5'- GCTCACGGCCCAGGAATAGAG-3', 5'-  
153 ACCGGTGGTCATCCCCTGG-3'

154 **CD79B prom3** 5'- CCAGAGGCATCCACAGAGGAC-3', 5'-  
155 CCTGGGGGAGGGCAGGCTT-3'

156 **CD79B prom4** 5'- AAGCCTGCCCTCCCCCAGG-3', 5'- CCGCCTCTTCCTCACCAGG-  
157 3'

158 **CD79B prom5** 5'- CCTGGTGAGGAAGAGGCGG-3', 5'-  
159 ACCCCAAACCCGTGACAACG-3'

160 **CD79B UTR/CDS6** 5'- CGTTGTCACGGGTTTGGGGT-3', 5'-  
161 CAGCAGCAGCAACGCCACCA-3'

162 **CD79B CDS7** 5'- TGGTGGCGTTGCTGCTGCTG-3', 5'- GAGGCAGAGCCGCAGGGC-  
163 3'

164

165 **Expanded Data Supplementary File With Full Western Blots**

166

167 MW marker used for all Western Blots:

168 Bio-Rad Precision Plus Protein™ Dual Color Standards

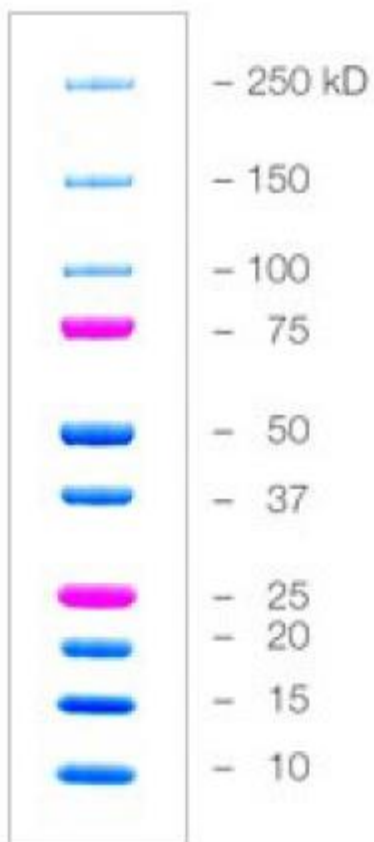

169

170

171

172

173

174

175

176 **Figure 1A: Full-membrane Western blot data (\* indicates remaining signal from a**  
177 **previous blot on the membrane)**

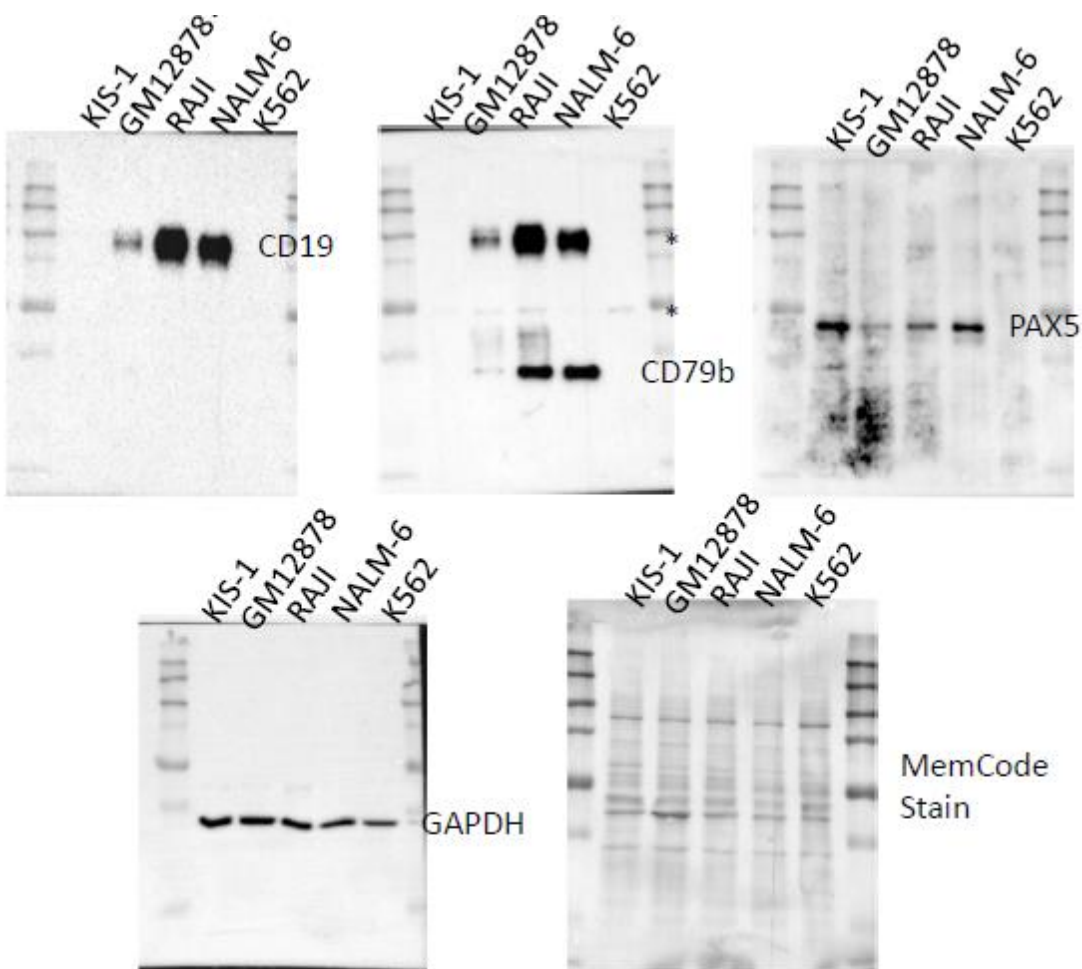

178  
179  
180  
181  
182  
183  
184  
185

186 **Figure 5C: Full-membrane Western blot data. (\* indicates remaining signal from a**  
 187 **previous blot on the membrane)**

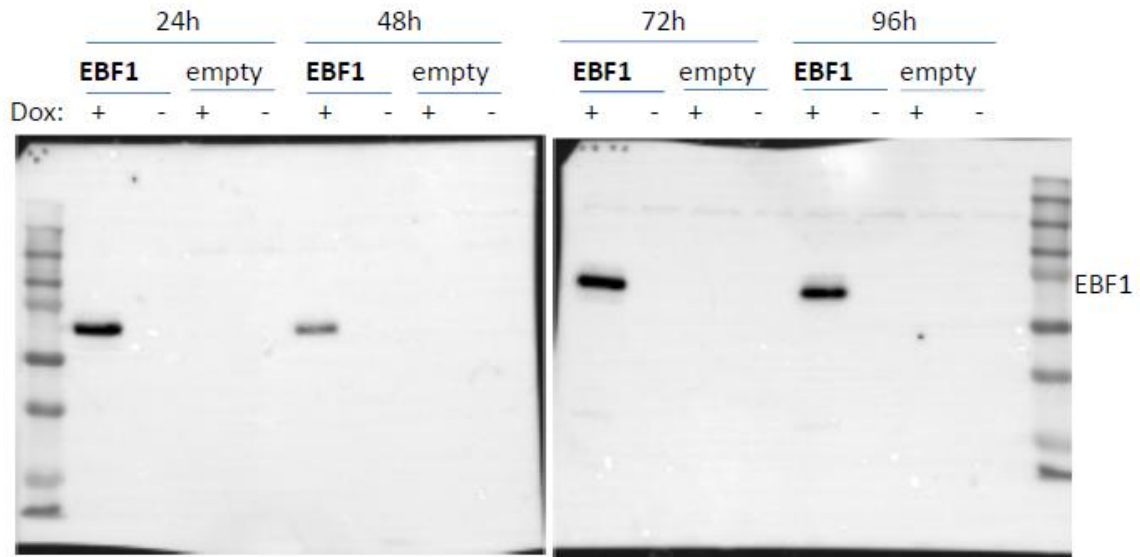

188

189

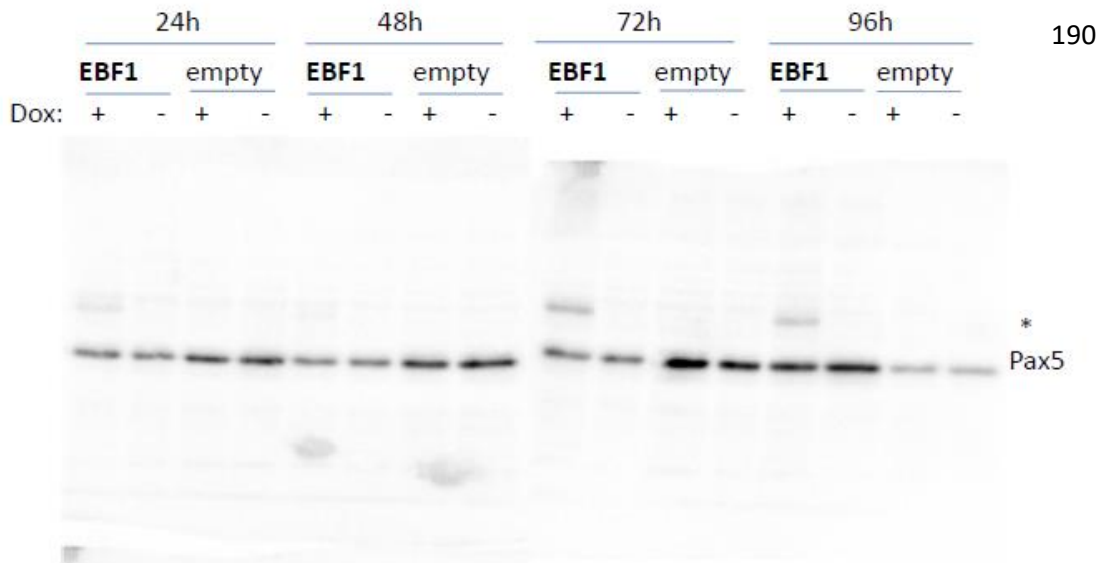

190

191

192

193

194

195 **Figure 5C: Full-membrane Western blot data (\* indicates remaining signal from a**  
196 **previous blot on the membrane)**

197

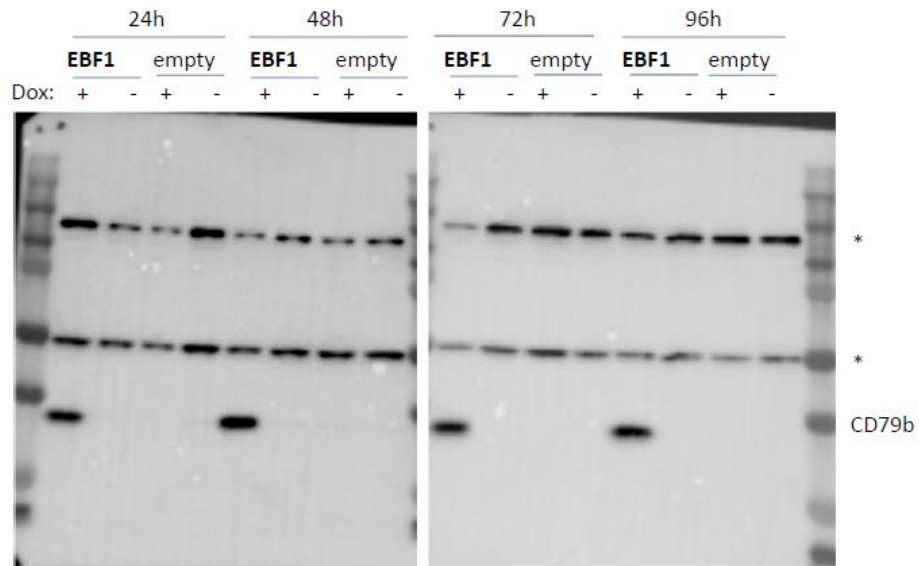

198

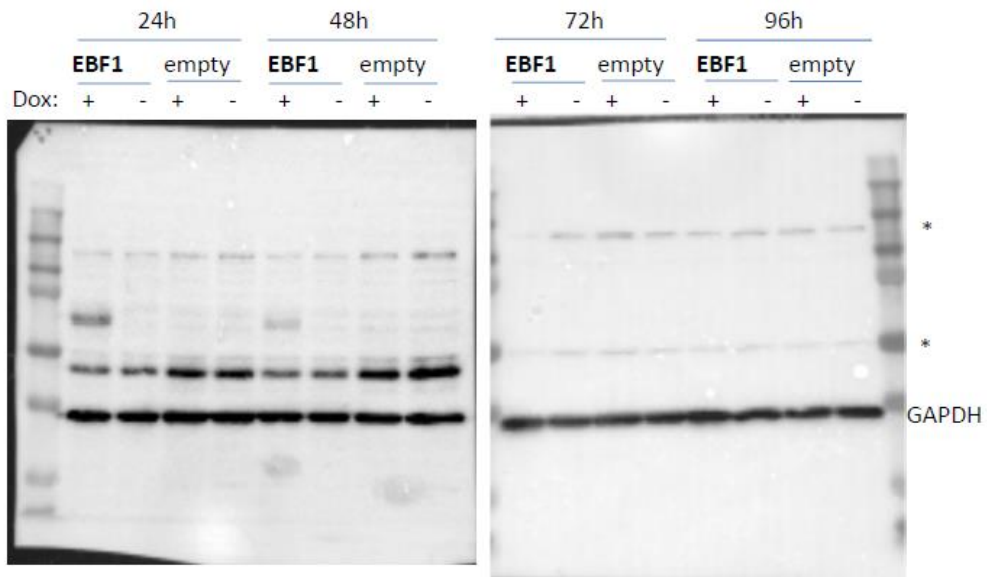

199

200

201

202 **Figure 6A: Full-membrane Western blot data (\* indicates remaining signal from a**  
203 **previous blot on the membrane)**

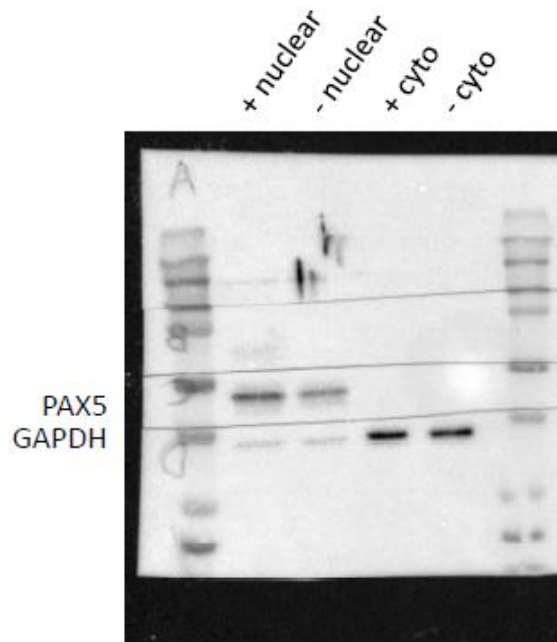

204

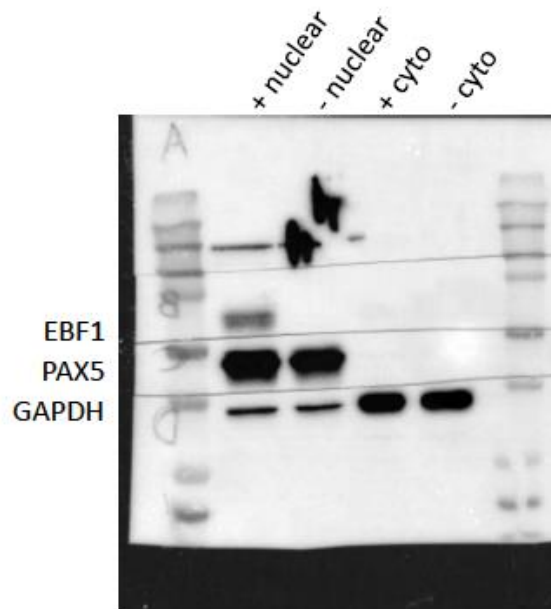

205

206 **Original blots were cut for hybridization with different antibodies and then re-**  
207 **assembled**

208 **Figure 6B: Coomassie staining of the second biological replicate PAX5**  
209 **immunoprecipitations used for proteomic identification of PAX5-binding proteins.**

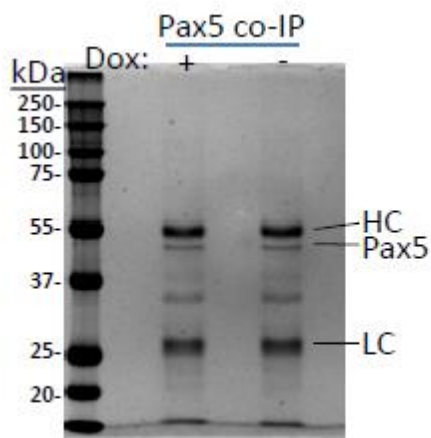

210  
211  
212  
213  
214  
215  
216  
217  
218  
219  
220  
221  
222  
223  
224



225 **Figure 6C: Full membranes**

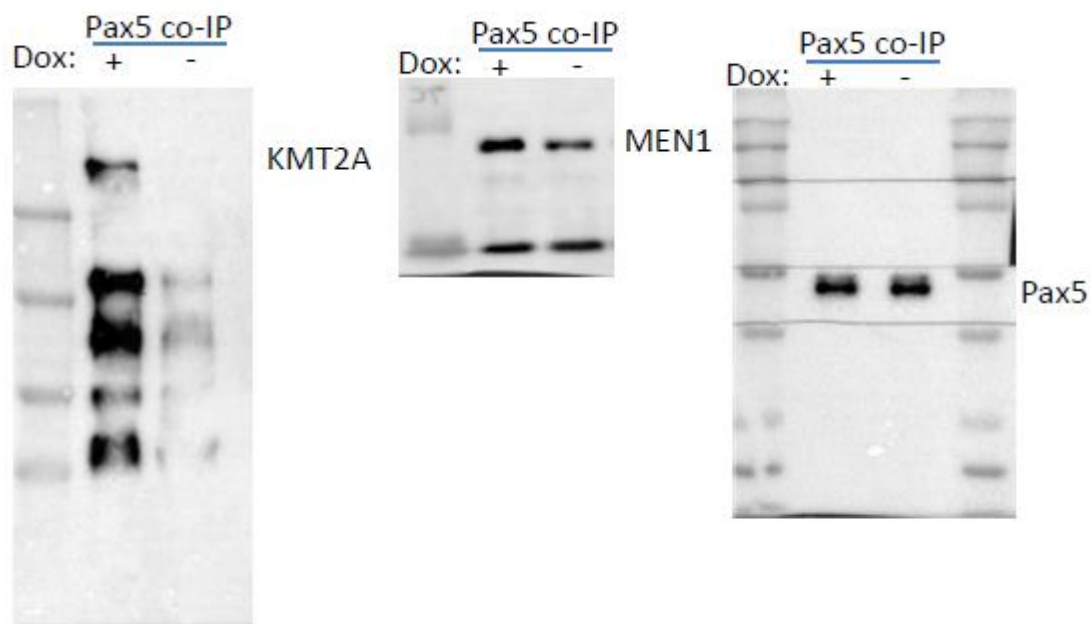

226

227 **Original blots were cut for hybridization with different antibodies and then re-**  
228 **assembled**

229

230

231

232

233

234

235

236

237

238

239 **Figure 6D: Full membranes**

240

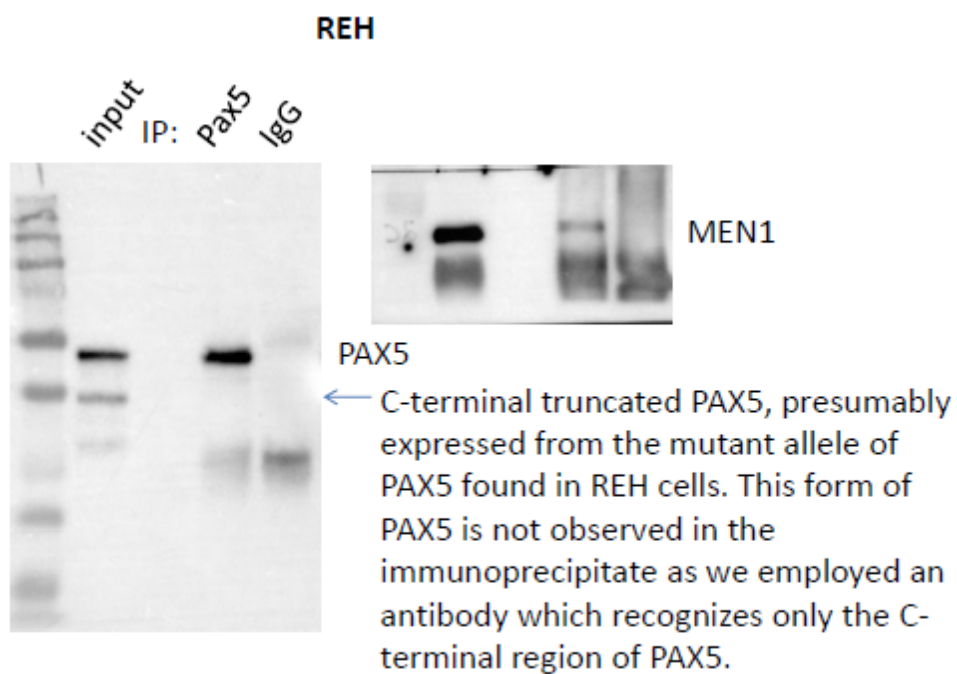

241

242

243

244

245

246

247

248

249

250

251

252 **Figure 6D: Full membranes**

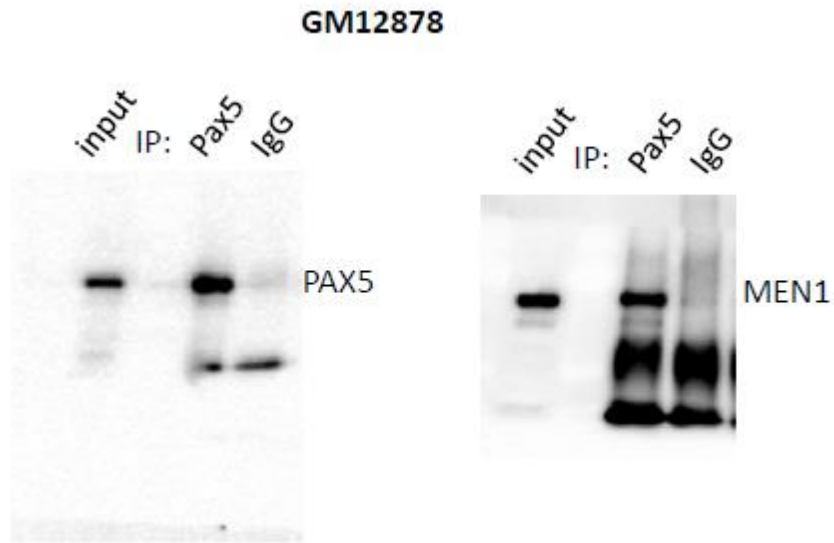

253

254

255

256

257

258

259

260

261

262

263

264

265

266
